# Supplementary material
Source: publisher figshare collection journal article supplement (https://acs.figshare.com/ndownloader/files/5762622)
Supplement: Supplementary file 1 [file 5762622]

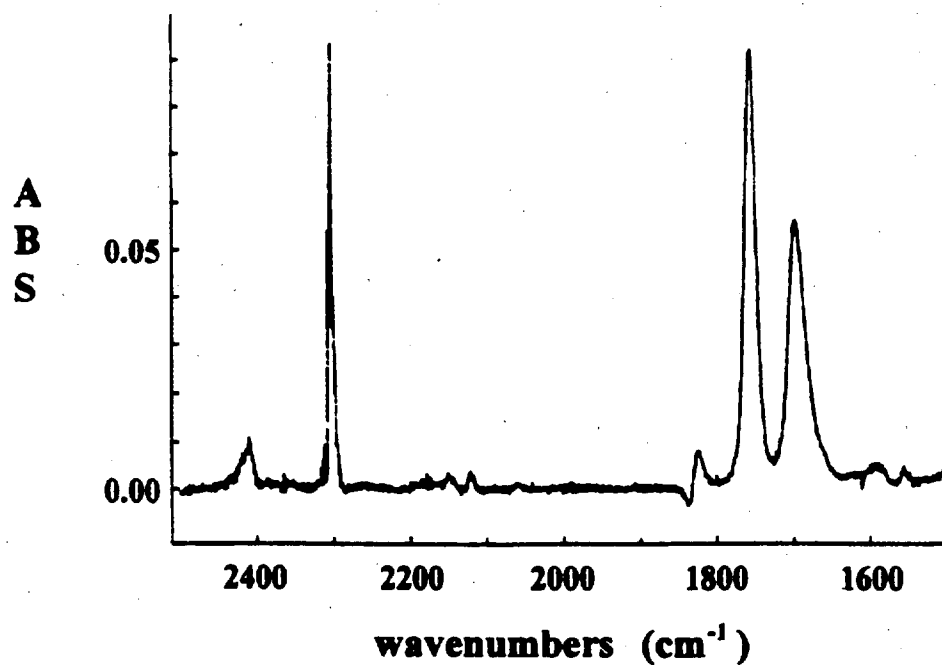

Supplementary Figure 1. IR spectrum of  $1B^-$  obtained after a cathodic electrolysis of 1 mM  $1B$  in  $CH_2Cl_2/0.1\text{ M } [NBu_4][PF_6]$  at 223 K in an IRTTLE cell.

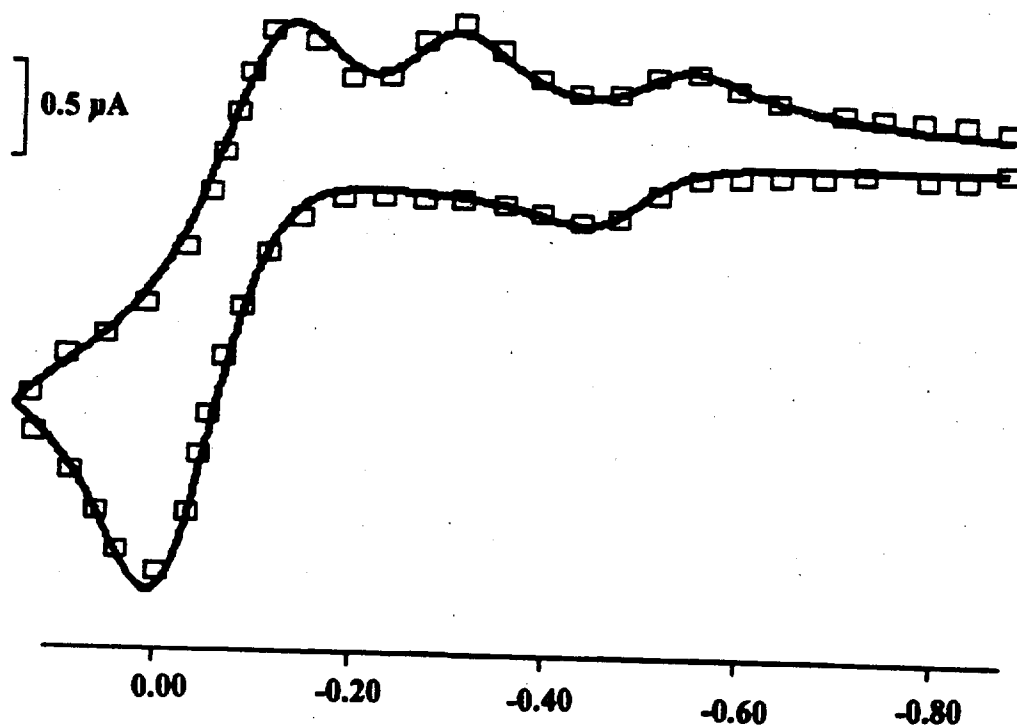

### Volts vs ferrocene

Supplementary Figure 2. Comparison of experimental CV curve (open boxes) with that calculated (solid line) for **1B** in  $\text{CH}_2\text{Cl}_2$ ;  $T = 223 \text{ K}$ ,  $v = 0.6 \text{ V/s}$ .  $E_{1/2}(\text{1B}) = 0.29 \text{ V}$ ,  $E_{1/2}(\text{1T/1F}) = 0.11 \text{ V}$ ,  $k(\text{1B}^+ \rightarrow \text{1T}^+) = 1.6 \text{ s}^{-1}$ . In this experiment an oxidizable impurity was present having an  $E_{1/2}$  of  $-0.13 \text{ V}$ . The simulation therefore included a second species with a concentration of 14 % relative to that of **1B**.

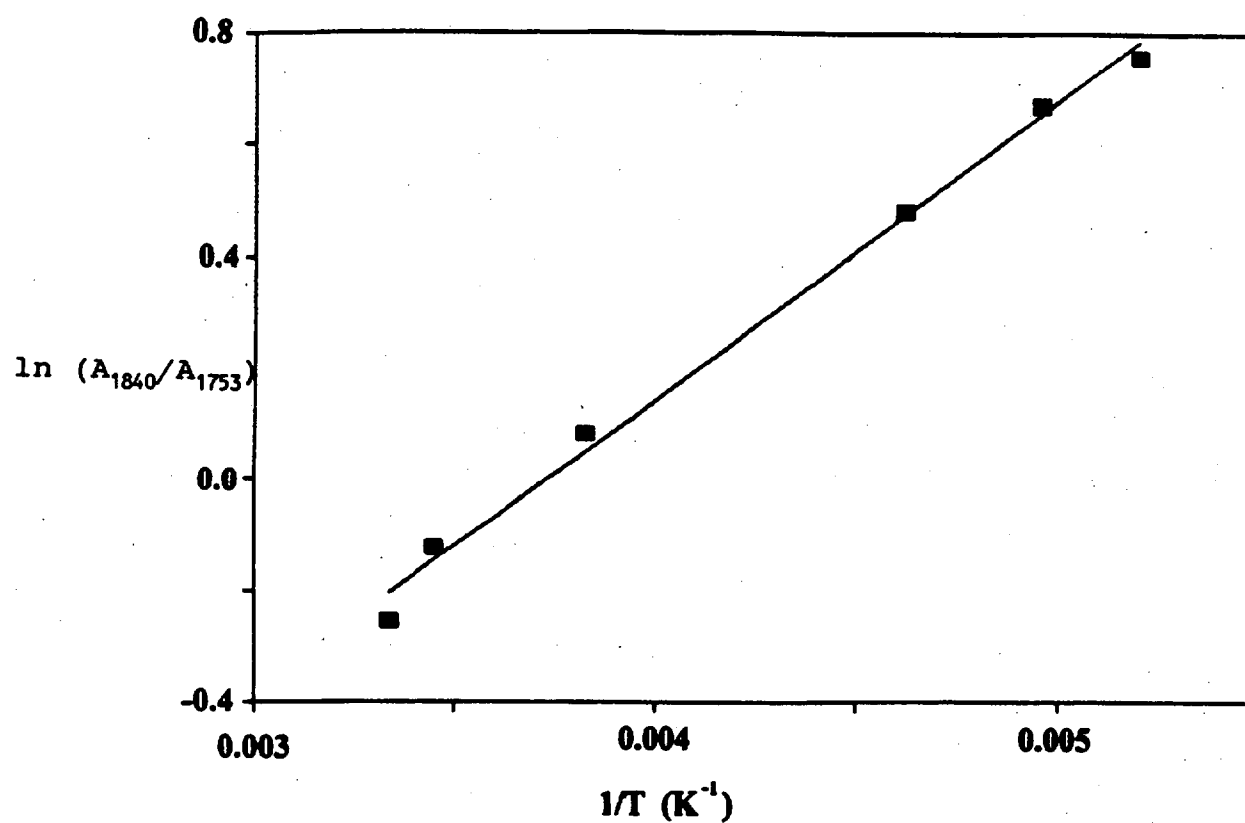

Supplementary Figure 3. Plot of  $\ln (A_{1840}/A_{1753})$  vs  $1/T$  to obtain  $\Delta H$  for the equilibrium of Eq 3.

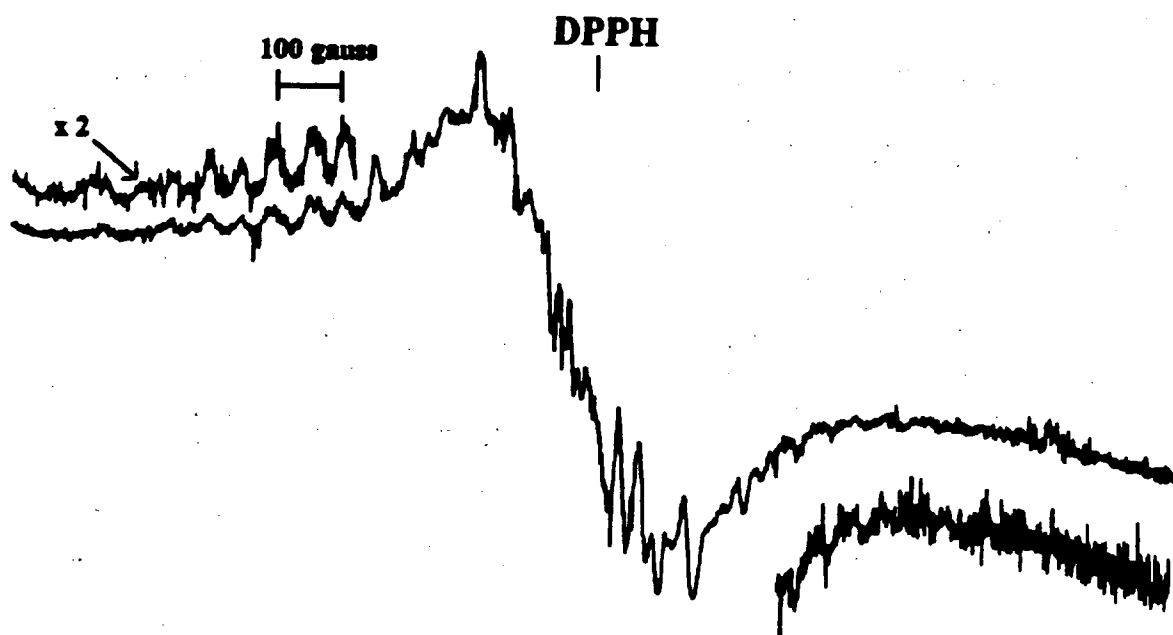

Supplementary Figure 4. Frozen solution (77 K) EPR spectrum of  $1F^{\bullet}$  produced by the cathodic reduction of a 1 mM solution of 1T/1F at 223 K in 1:1  $CH_2Cl_2:C_2H_4Cl_2$ .
